# Supplementary material for: Stabilization of DEPTOR sensitizes hypopharyngeal cancer to radiotherapy via targeting degradation
Source: PubMed Central journal article supplement — Mol Ther Oncolytics. 2022 Aug 5;26:330–46. doi: 10.1016/j.omto.2022.08.002 (PMC9420345; doi:10.1016/j.omto.2022.08.002), 2022-08-05
Supplement: mmc1.pdf [file mmc1.pdf]

**Supplemental information**

**Stabilization of DEPTOR sensitizes  
hypopharyngeal cancer to radiotherapy  
via targeting degradation**

**Xuecen Wang, Zhirui Cao, Xin Yue, Tingyu Liu, Gesi Wen, Dongmei Jiang, Weijian Wu, Liyuan Le, Yan Wang, Chengtao Wang, Ziyang Wang, Meng Jin, Meiyuan Zhu, Shasha He, Xiaoyue Zhang, Xianzhang Bu, Ran-yi Liu, Zhenwei Peng, and Yong Chen**

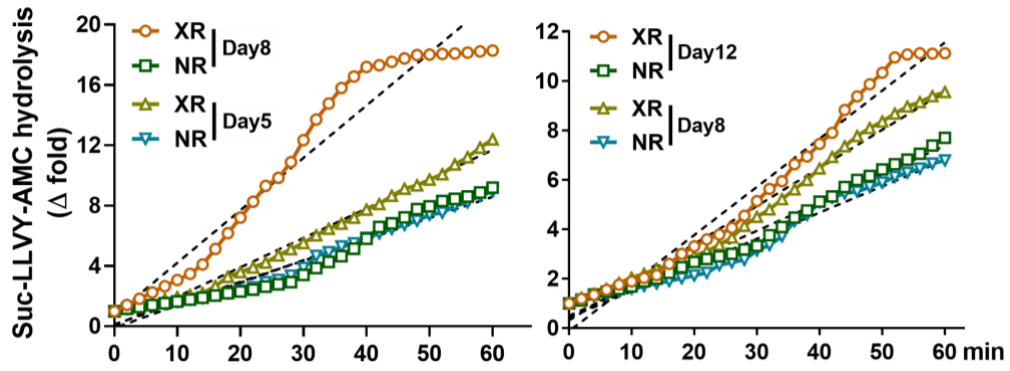

**Fig. S1. XR induces the increase proteasome hydrolysis activities.**

The proteasome hydrolysis activities in 2D adherent monolayers (Left) and 3D-spheroid suspensions (Right) FaDu cells lysis treated as in Figure 1A. (Related to Fig. 1B)

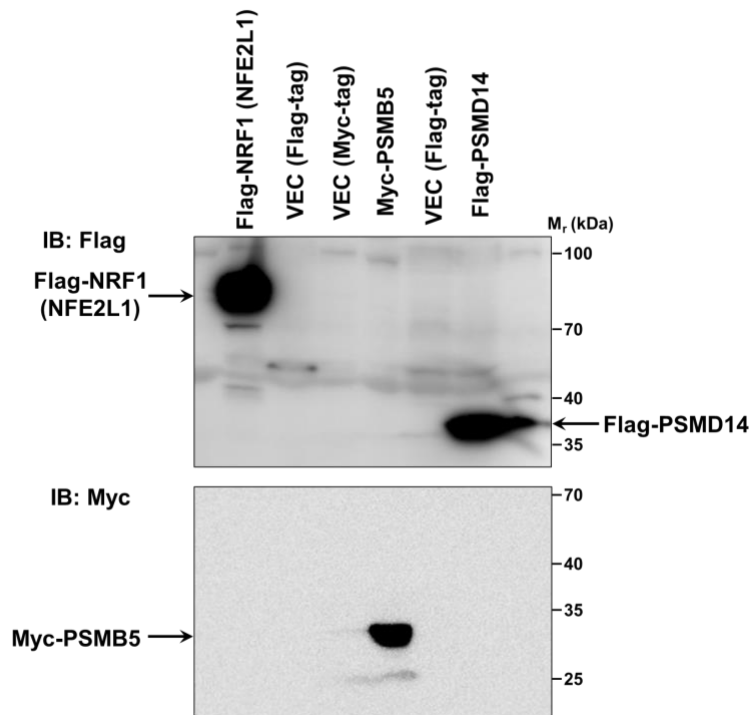

**Fig. S2. Validation of plasmid overexpression.**

Western blot analysis showing the validation of the exogenous overexpression of FLAG-NRF, FLAG-PSMD14 and Myc-PSMB5 in FaDu cells. (Related to Fig. 1D-H)

**A**

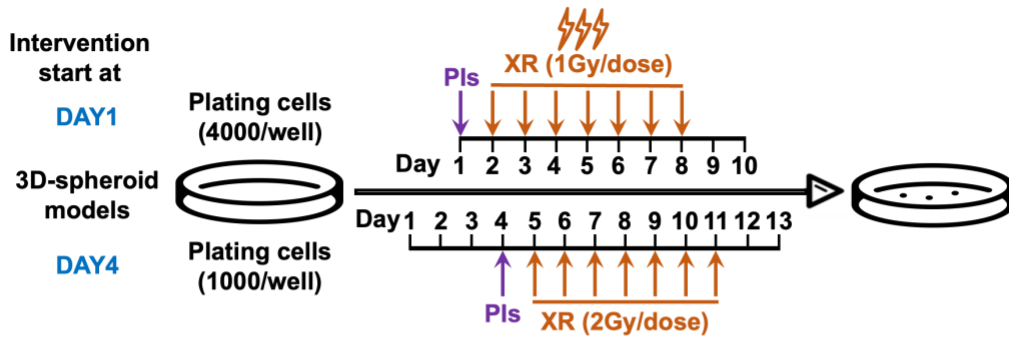

**B**

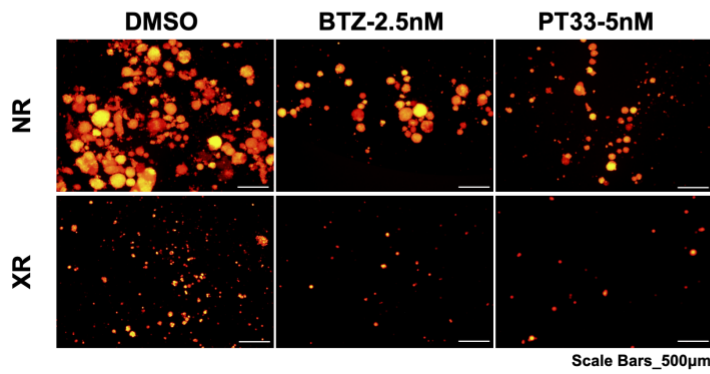

**C**

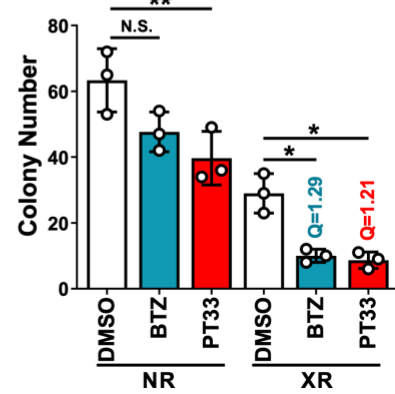

**D**

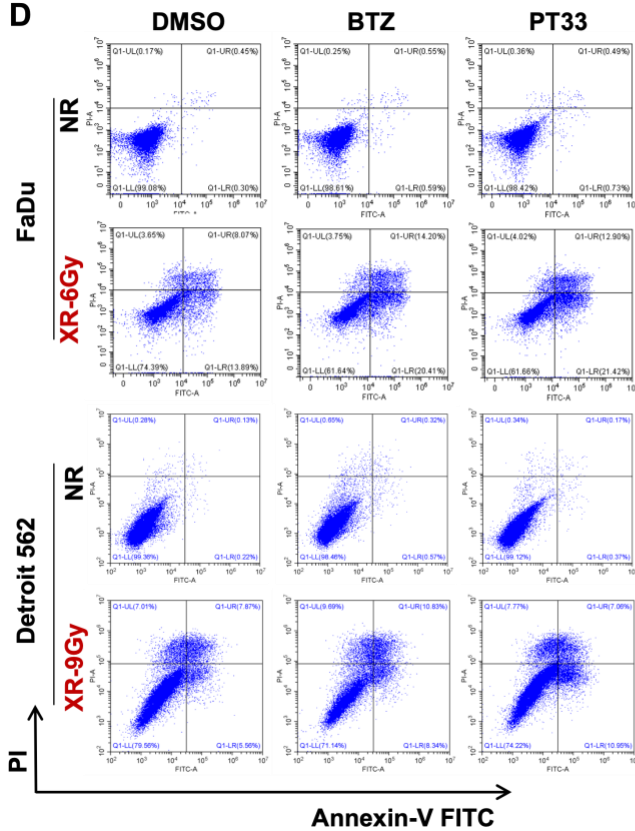

**E**

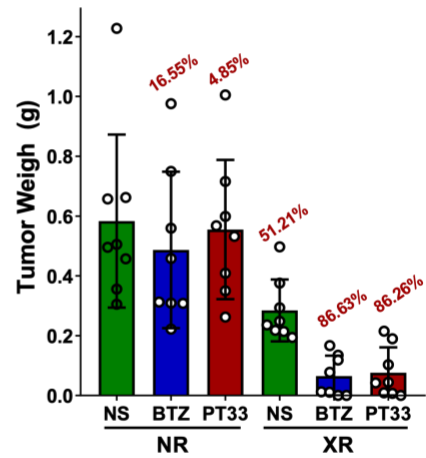

**Fig. S3. Proteasome inhibitors sensitize HC cells to radiation.**

**(A)** Schematic illustration showing the treatment of XR plus PIs in two different modes in conditional three-dimensional spheroid culture models: cells were treated starting on day 1 (before forming spheroid) or day 4 (forming spheroid) after planting FaDu cells expressing mCherry. (related to Fig. 2C, 2E & S3B and S3C)

**(B-C)** Conditional 3D spheroid formation assays for FaDu cells treated with PIs (DMSO as vehicle control) plus XR (NR as control) starting on day 1 as in S3A. (B) Representative images. (C) Numbers of spheres (diameter  $\geq 75 \mu\text{m}$ ) from 3 independent experiments, shown as mean  $\pm$  S.D (1-way ANOVA). Q value indicated the combination effect of XR treatment and PIs, referring to the legend for panels Fig. 2E.

**(D)** Representative images of Annexin V/propidine iodide double-staining assays with flow cytometry in FaDu and Detroit 562 cells at 72 h after XR (6-Gy) treatment. Cells were pretreated with PIs (BTZ: 5 nM, PT33: 10 nM; DMSO as vehicle control) 12 h before XR. (related to Fig. 2F)

**(E)** The xenograft tumor weights were measured and the inhibitory rates were calculated. (Related to Fig. 2H) \* $P < 0.05$ ; \*\* $P < 0.01$ ; \*\*\* $P < 0.001$ ; \*\*\*\* $P < 0.0001$ ; N.S., not significant.

A

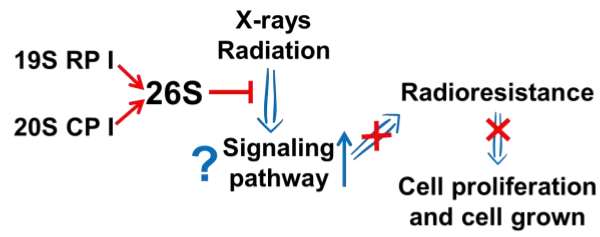

B

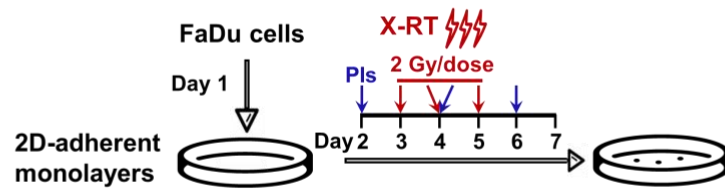

C

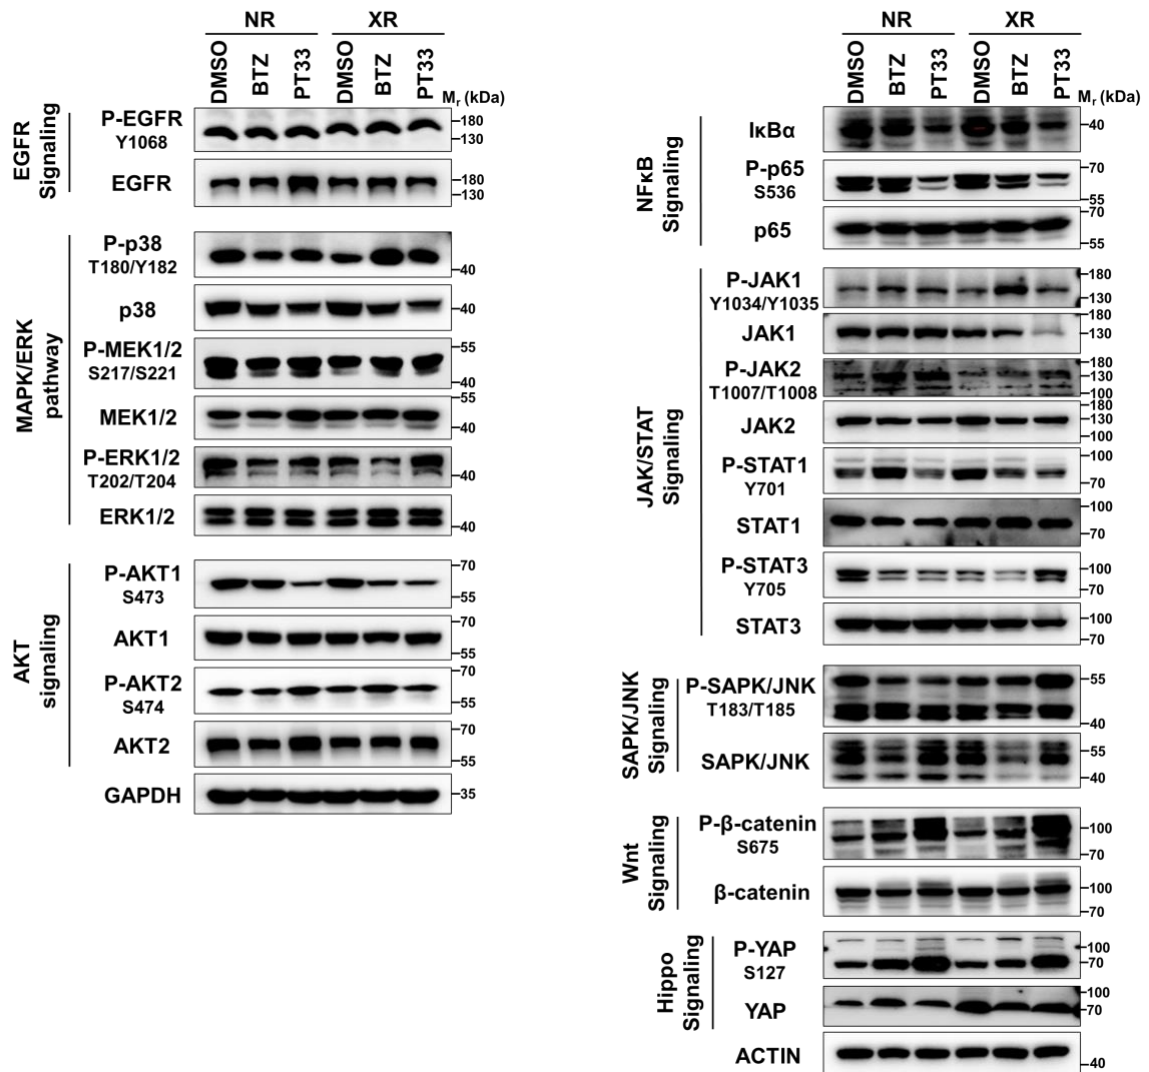

**Fig. S4. Inhibition of proteasome suppresses XR-induced elevation in mTORC1 signaling.**

(A) Schematic illustration showing the design of the signaling pathway screening.

(B) Schematic illustration showing the treatment of the combination of XR and PIs (BTZ: 10 nM, PT33: 20 nM) in FaDu cells. After plating the cells on Day 1, cells were treated with PIs on day 2, 4, 6, meanwhile, XR treatment of 2-Gy/day was carried out on day 3-5. (Related to Fig. 3A and Fig. S4C)

(C) Western blot assays of the activities of multiple vital signal pathways (including EGFR, MAPK/ERK, AKT signaling, NF- $\kappa$ B, JAK/STAT, SAPK/JNK, Wnt, Hippo signaling) in FaDu cells treated with PT33/BTZ (DMSO as vehicle control) plus XR (NR as control) as in (B).

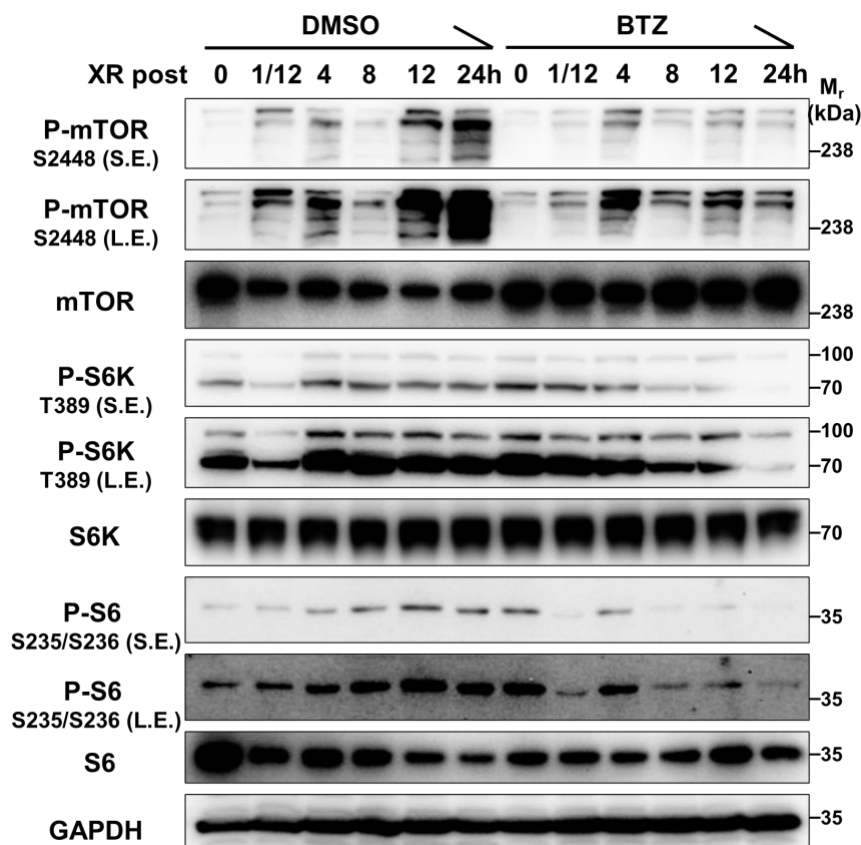

**Fig. S5. BTZ suppresses XR-induced elevation in mTORC1 signaling.**

Western blot analysis of the process of the mTORC1 signaling activation in FaDu cells treated with BTZ (10 nM, DMSO as vehicle control) followed by XR (6-Gy) at indicated times.

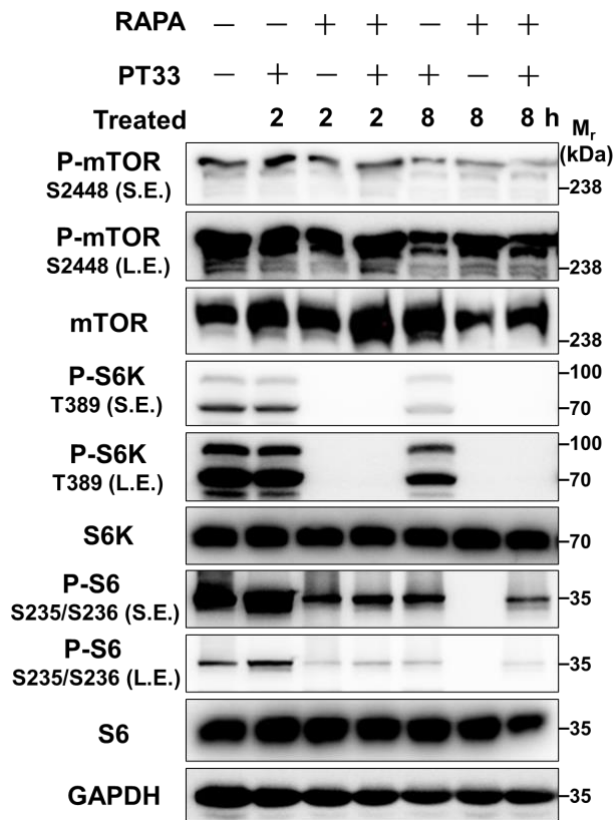

**Fig. S6. Effects of RAPA/PT33 on mTORC1 signaling induced by XR.**

Western blot analysis of the levels of mTORC1 signaling pathway components in FaDu cells treated with rapamycin (RAPA, 100 nM) or PT33(20 nM) for 2 or 8 h, DMSO as vehicle control. (Related to Fig. 3E)

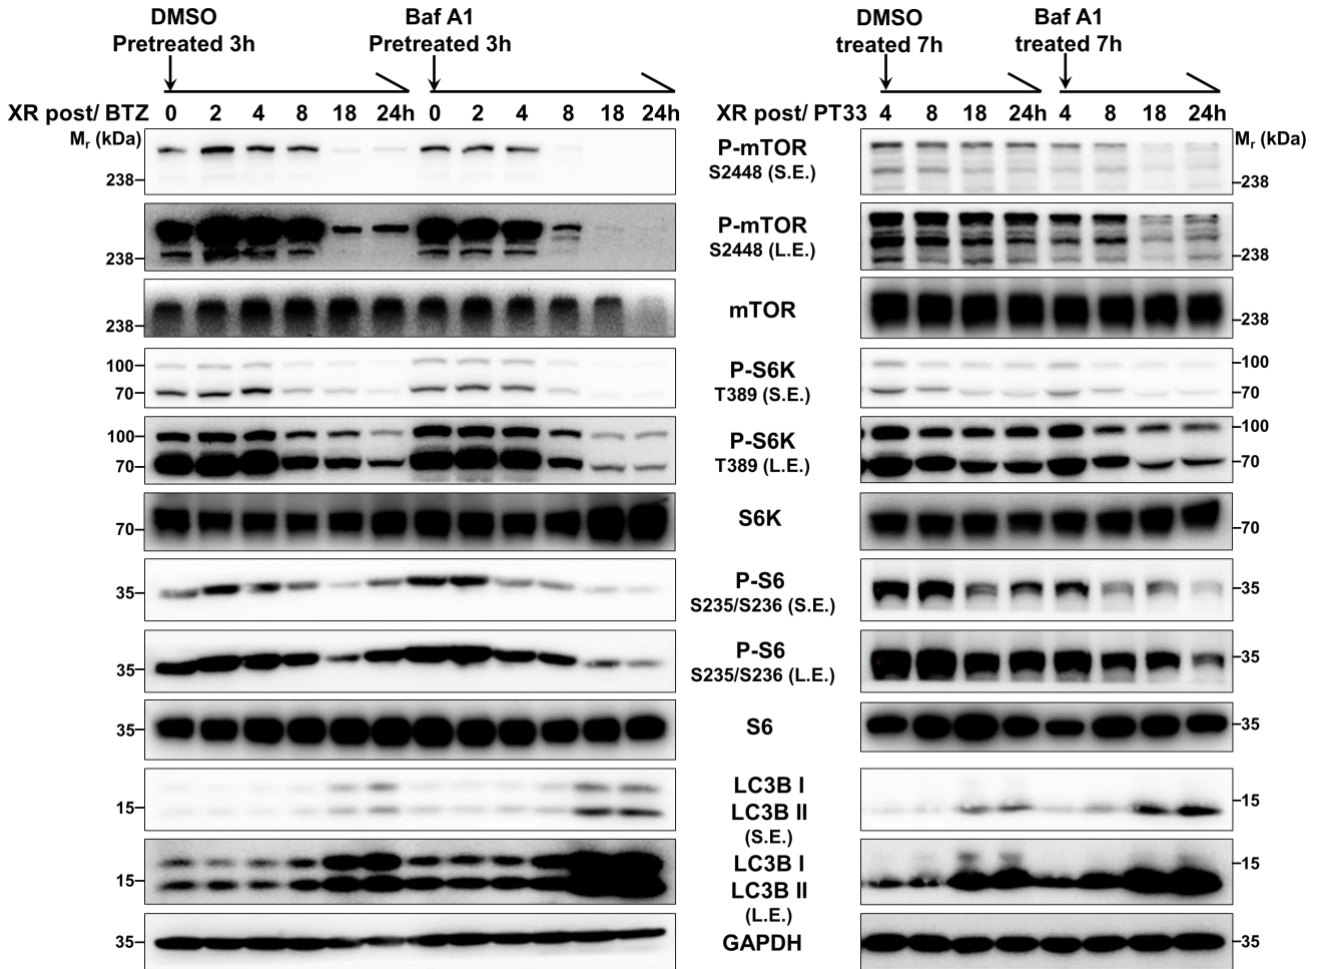

**Fig. S7. Effects of Baf A1 on PI-mediated suppression of elevated mTORC1 signaling after XR.** Western blot analysis of the influence on mTORC1 signaling in FaDu cells pretreated with Baf A1 (100 nM) for 3 h before BTZ (10 nM) plus XR treatment (Left) or for 7 h before PT33 (20 nM) plus XR treatment (Right) (6-Gy), DMSO as vehicle control.



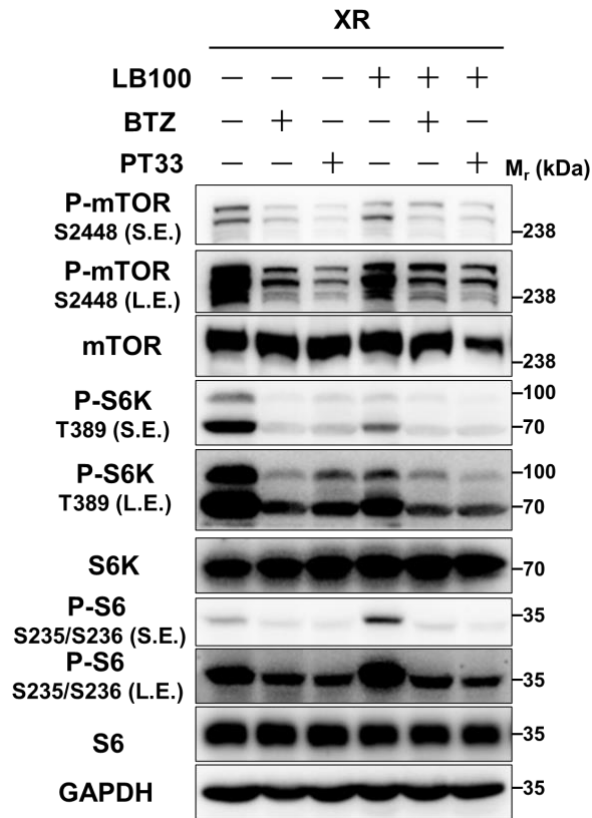

**Fig. S8. Effects of LB100 on PI-mediated suppression of elevated mTORC1 signaling after XR.** Western blot analysis of the influence on mTOR signaling by LB100 in FaDu cells, which after treated with 6-Gy XR plus PIs (10 nM BTZ or 20 nM PT33, DMSO as vehicle control).

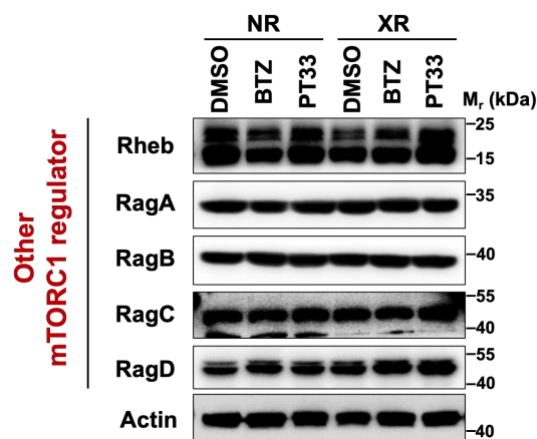

**Fig. S9. The effects of BTZ/PT33 plus XR on other mTORC1 components/regulators.** Western blot analysis of the levels of the other mTORC1 components/regulators in FaDu cells treated with PIs (DMSO as vehicle control) plus XR (NR as control) treatment as in Fig. S4B. (Related to Fig. 4A)

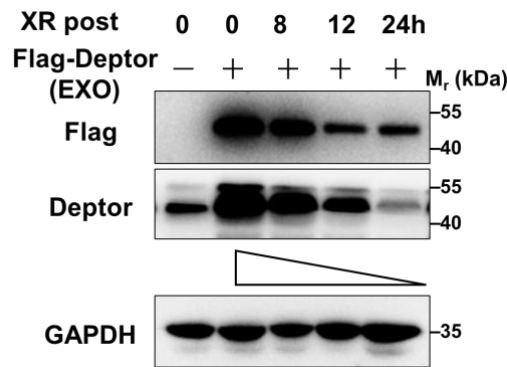

**Fig. S10. Effects of XR on DEPTOR.**

Western blot analysis of the levels of endogenous DEPTOR and exogenous FLAG-tagged DEPTOR after XR (6-Gy) treatment at the indicated time.

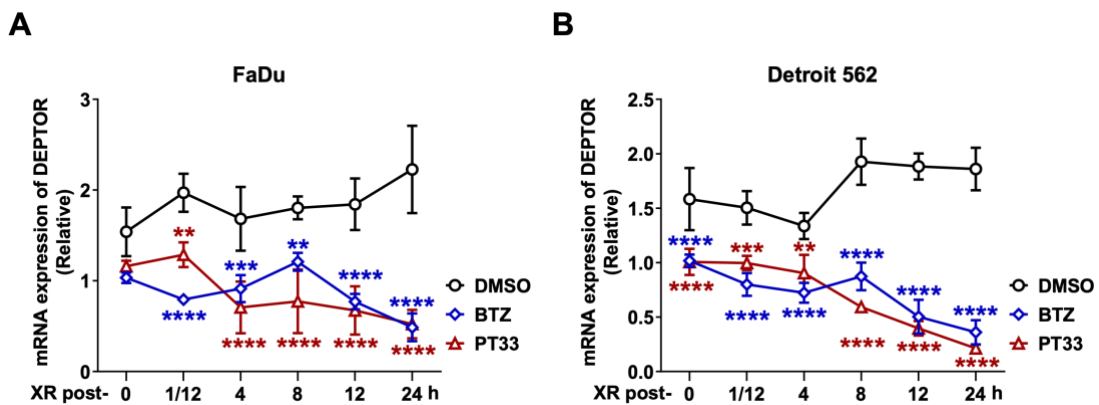

**Fig. S11. PIs efficiently maintained the stability of DEPTOR after XR treatment at mRNA levels.**

RT-qPCR assays of the DEPTOR levels in (A) FaDu and (B) Detroit 562 cells treated with BTZ (20 nM) or PT33 (10 nM) followed by XR for indicated times at the mRNA levels. Data are presented as mean  $\pm$  S.D (n=3). All data are presented as mean  $\pm$  S.D. (n = 3). 1 way ANOVA. \*\*P < 0.01; \*\*\*P < 0.001; \*\*\*\*P < 0.0001.

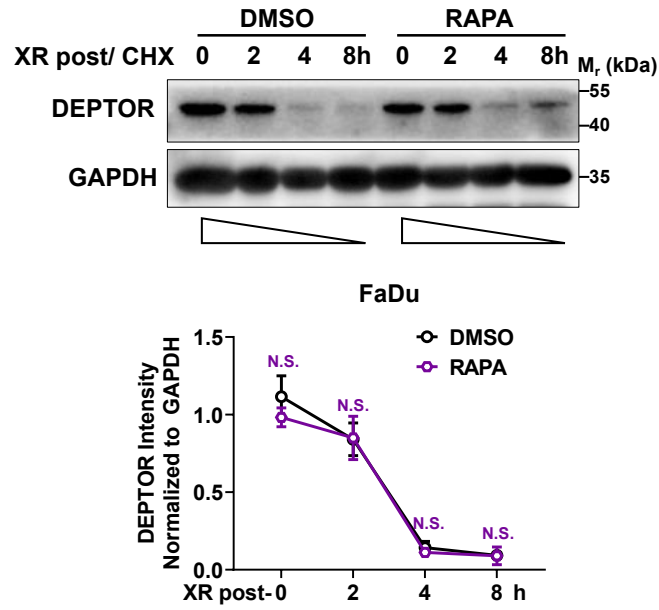

**Fig. S12. Rapamycin hardly affected DEPTOR persistently after XR plus CHX treatment.** Western blot analysis of the DEPTOR levels in FaDu cells treated with rapamycin (RAPA, 100 nM) for 12 h before CHX (50  $\mu$ M) plus XR treatment for the indicated time. (Upper) Representative images; (Below) the relative DEPTOR levels, shown as the DEPTOR grayscale intensity normalized to GAPDH at indicated times after XR treatment. Data are presented as mean  $\pm$  S.D (n=3). All data are presented as mean  $\pm$  S.D. (n = 3). 2-sample t-test. N.S., not significant.

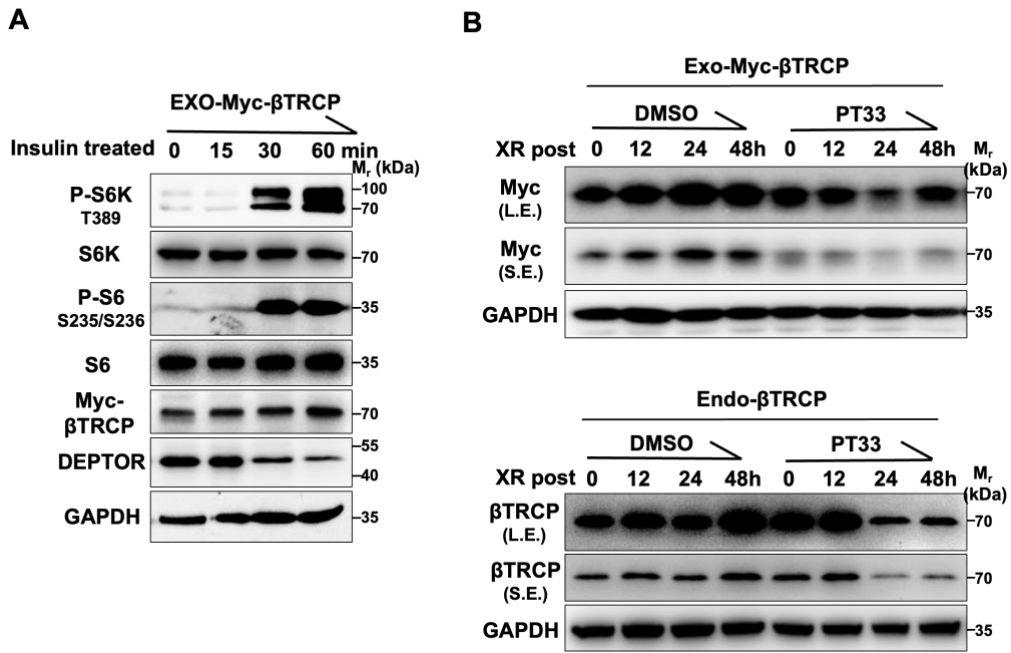

**Fig. S13. The effects of Insulin or XR plus PT33 on  $\beta$ -TRCP.**

(A) Western blot analysis of mTORC1 signaling and Myc- $\beta$ TRCP levels in FaDu cells transfected exogenous Myc- $\beta$ TRCP and treated with Insulin for indicated the time.

(B) Western blot analysis of the exogenous (Upper) and endogenous (Below) Myc- $\beta$ TRCP levels in FaDu cells pretreated with PT33 (10 nM), and consequently exposed to XR treatment for the indicated time.

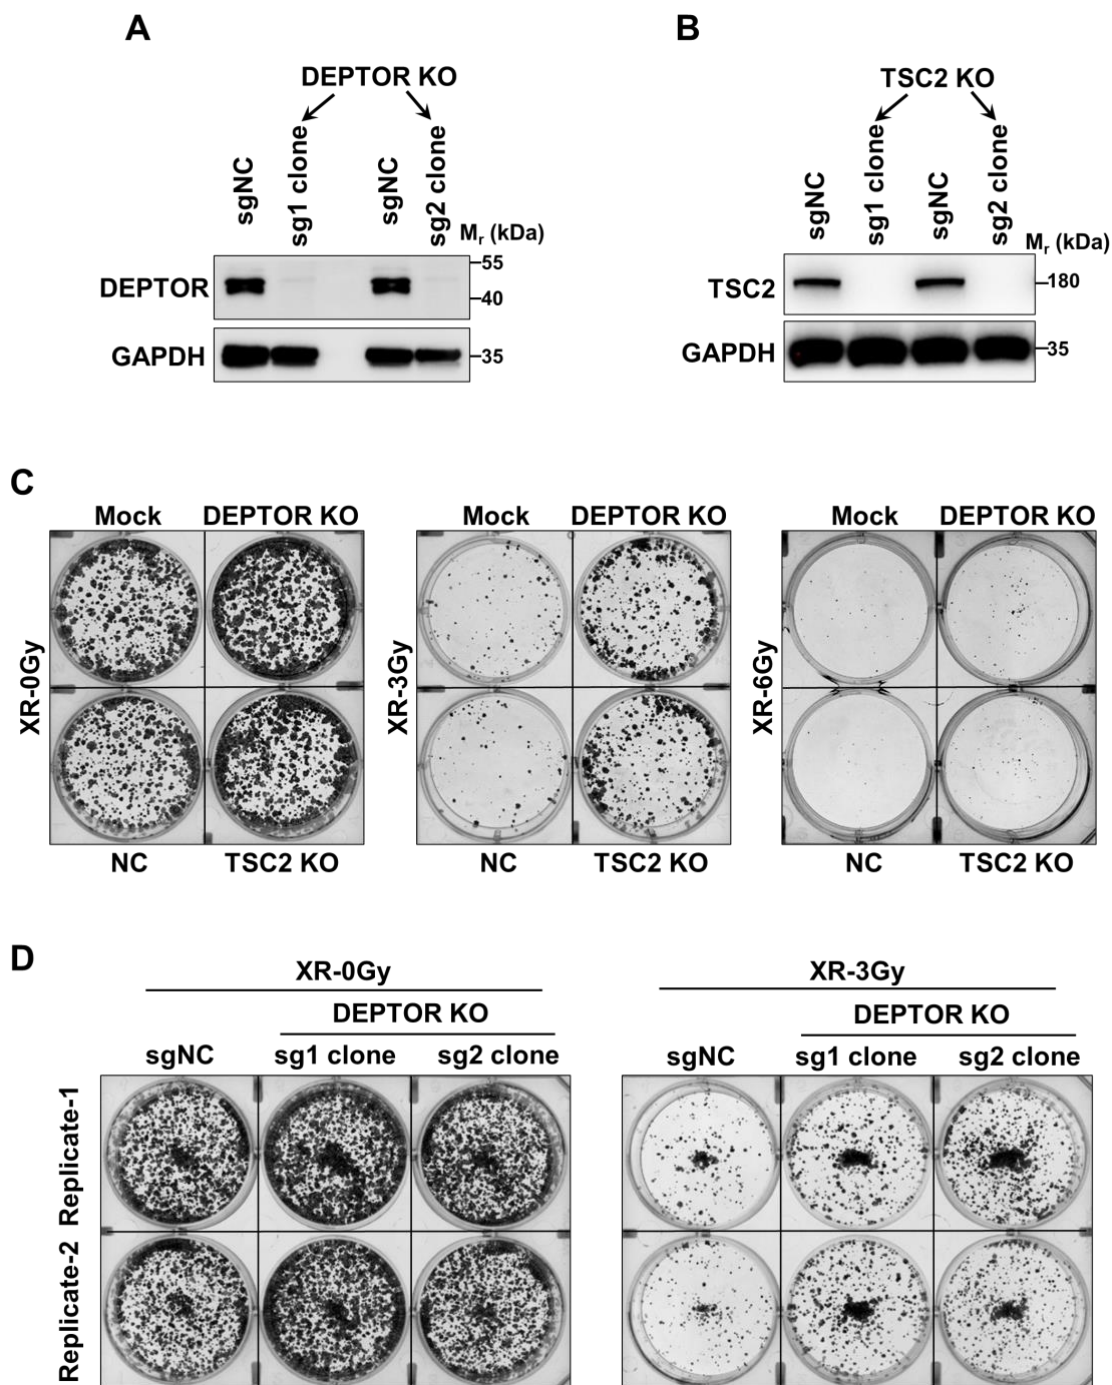

**Fig. S14. Effects of DEPTOR or TSC2 on mTORC1-governed radioresistance.**

DEPTOR- (A) and TSC2- (B) Knockout (KO) efficiencies by CRISPR-Cas9 gene editing were validated by western blot. (C-D), Representative images of 2D adherent colony formation assays in DEPTOR/TSC2 CRISPR KO FaDu cells treated with a single 3- or 6-Gy dose of XR. (Related to Fig. 4G)

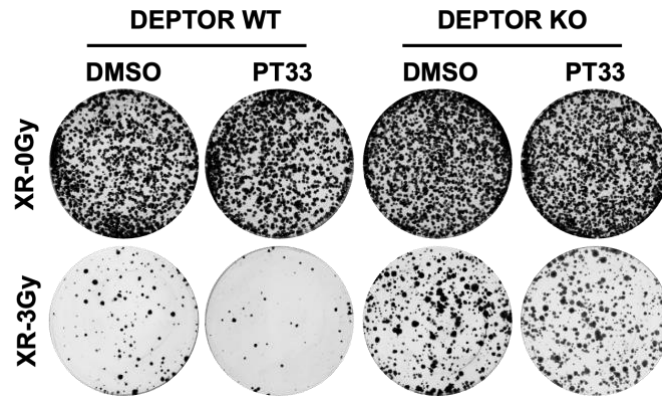

**Fig. S15. Effects of DEOTOR on radioresistance in cells treated with PT33 plus XR.**

Representative images of 2D adherent colony formation assays in DEPTOR-KO or WT FaDu cells pretreated with PT33 (10 nM), and consequently exposed to 3-Gy XR treatment. (Related to Fig. 4I)

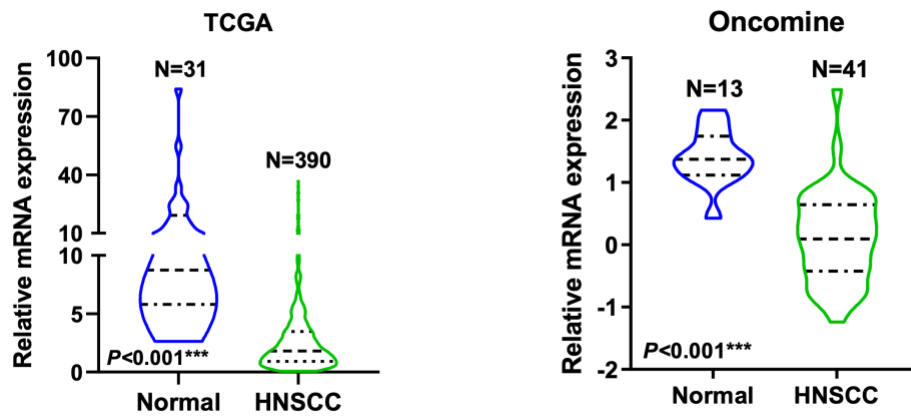

**Fig. S16. DEPTOR levels in gene expression public databases.**

Expression levels of DEPTOR in HC and normal tissues in **(Left)** TCGA and **(Right)** Oncomine databases.

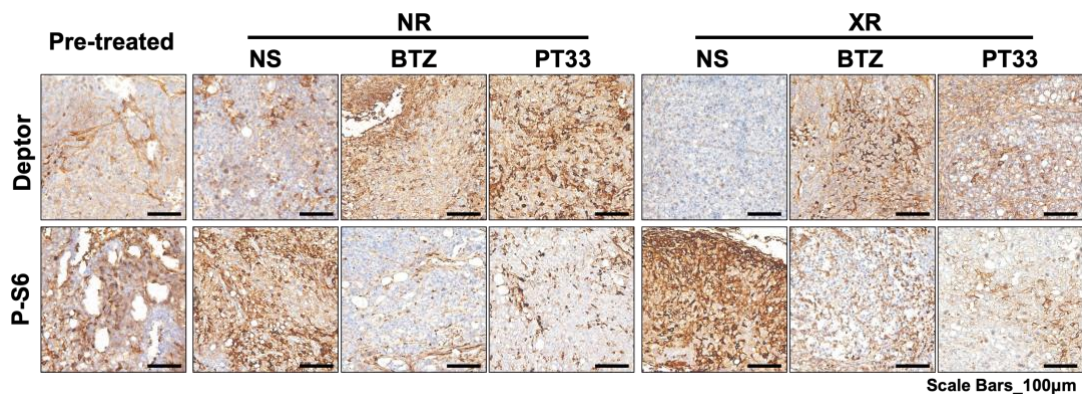

**Fig. S17. Representative IHC images.**

The expression of DEPTOR or P-S6 in nude mice bearing subcutaneous FaDu xenograft with the combined treatment of PIs (Normal Saline group as vehicle control) and XR (NR as control).

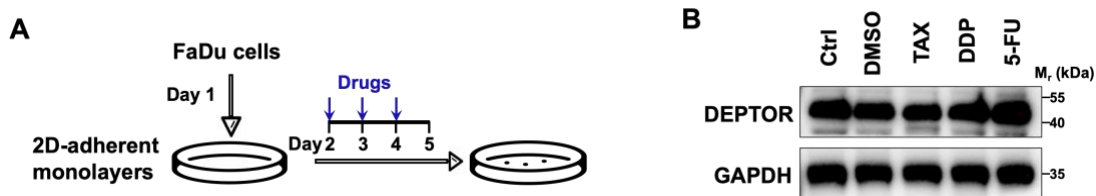

**Fig. S18. Effects of chemotherapy drugs on DEPTOR.**

Western blot analysis of DEPTOR levels in FaDu cells with various chemotherapy drugs treatment.

(A) Schematic illustration showing the treatment method of drugs. (B) Representative images.

**Table S1. Univariate and multivariate Cox regression analyses of prognostic factors for hypopharyngeal cancer patient**

| Variables                               | PFS                  |                  |                    |                  | OS                   |                |                     |                |
|-----------------------------------------|----------------------|------------------|--------------------|------------------|----------------------|----------------|---------------------|----------------|
|                                         | Univariate           |                  | Multivariate       |                  | Univariate           |                | Multivariate        |                |
|                                         | HR (95% CI)          | <i>P</i> value   | HR (95% CI)        | <i>P</i> value   | HR (95% CI)          | <i>P</i> value | HR (95% CI)         | <i>P</i> value |
| Gender (Female vs. male)                | 0.042 (0.000-15.145) | 0.292            |                    |                  | 0.04 (0-23.056)      | 0.321          |                     |                |
| Age (y) (>58 vs. ≤58)                   | 1.661 (0.760-3.629)  | 0.203            |                    |                  | 1.089 (0.438-2.704)  | 0.855          |                     |                |
| Smoke (Yes vs. No)                      | 1.416 (0.568-3.533)  | 0.456            |                    |                  | 1.971 (0.646-6.008)  | 0.233          |                     |                |
| Drink (Yes vs. No)                      | 1.560 (0.656-3.713)  | 0.315            |                    |                  | 2.810 (0.919-8.599)  | 0.07           |                     |                |
| cT (III-IV vs. I-II)                    | 1.101 (0.462-2.625)  | 0.829            |                    |                  | 2.788 (0.806-9.637)  | 0.105          |                     |                |
| cN (2-3 vs.0-1)                         | 1.184 (0.475-2.951)  | 0.717            |                    |                  | 2.084 (0.605-7.179)  | 0.245          |                     |                |
| cTNM (IVA-IVB vs. II-III)               | 0.637 (0.283-1.431)  | 0.275            |                    |                  | 1.174 (0.422-3.268)  | 0.758          |                     |                |
| Pathology classification                |                      |                  |                    |                  | 0.690 (0.264-1.801)  | 0.448          |                     |                |
| (High-In situ vs. Low-Intermediate)     | 0.992 (0.420-2.342)  | 0.986            |                    |                  |                      |                |                     |                |
| Induced chemotherapy (Yes vs. No)       | 0.550 (0.128-2.356)  | 0.421            |                    |                  | 0.212 (0.047-0.960)  | <b>0.044</b>   |                     |                |
| Induced chemotherapy regimens           |                      |                  |                    |                  | 1.243 (0.764-2.021)  | 0.381          |                     |                |
| (TPF vs. TP vs. PF vs. TPF/TP+PD-L1)    | 1.478 (0.971-2.249)  | 0.068            |                    |                  |                      |                |                     |                |
| Concurrent chemotherapy (Yes vs. No)    | 0.501 (0.171-1.473)  | 0.209            |                    |                  | 0.266 (0.085-0.830)  | <b>0.022</b>   |                     |                |
| tumour size (cm) (≥4 vs. > 2-≤4 vs. ≤2) | 1.183 (0.684-2.047)  | 0.548            |                    |                  | 2.187 (1.079-4.430)  | <b>0.03</b>    |                     |                |
| RECIST group (SD/PD vs. CR/PR)          | 2.771 (1.192-6.438)  | <b>0.018</b>     |                    |                  | 3.117 (1.131-8.588)  | <b>0.028</b>   |                     |                |
| Deptor (high vs. low)                   | 0.102 (0.038-0.278)  | <b>&lt;0.001</b> | 0.09 (0.030-0.271) | <b>&lt;0.001</b> | 0.203 (0.072-0.572)  | <b>0.003</b>   | 0.180 (0.058-0.561) | <b>0.003</b>   |
| p-S6 (high vs. low)                     | 4.926 (1.959-12.384) | <b>0.001</b>     |                    |                  | 5.334 (1.754-16.215) | <b>0.003</b>   |                     |                |

Boldface values are statistically significant.

Table Footnotes: Abbreviations: HR, hazard ratio; CI, confidence interval. cT, clinical T stage; cN, clinical N stage



**Table S2. Realtime q-PCR primers, related to method**

| Primers  | 5' to 3'                |
|----------|-------------------------|
| DEPTOR-F | GCAGCAGGAATGAAGGTCTG    |
| DEPTOR-R | GTATGTGCGGAGAAGACTCGTAT |
| GAPDH-F  | GAAGGTGAAGGTCGGAGTC     |
| GAPDH-R  | GAAGATGGTGATGGGATTTC    |
